# Supplementary material for: Efficiency of Simulation-Based Learning Using an ABC POCUS Protocol on a High-Fidelity Simulator
Source: MDPI journal article supplement (doi:10.3390/diagnostics14020173), 2024-01-12
Supplement: s1 [file s1]

**Table S1.** Evaluation criteria for the practical examination

| Criteria                                                                                                | Score                                                           |   |                                                                                                             |   |                                                                            |
|---------------------------------------------------------------------------------------------------------|-----------------------------------------------------------------|---|-------------------------------------------------------------------------------------------------------------|---|----------------------------------------------------------------------------|
|                                                                                                         | 1                                                               | 2 | 3                                                                                                           | 4 | 5                                                                          |
| 1. Applied knowledge of ultrasound equipment (simulator)                                                |                                                                 |   |                                                                                                             |   |                                                                            |
| Familiarity with the equipment and its functions, correct selection of the probe, using buttons.        | Unable to operate equipment                                     |   | Operates the equipment with some experience                                                                 |   | Familiar with operating the equipment                                      |
| 2. Image optimization                                                                                   |                                                                 |   |                                                                                                             |   |                                                                            |
| Consistently ensuring optimal image quality by adjusting gain, depth, focus, frequency etc              | Fails to optimize images                                        |   | Competent image optimization but not done consistently                                                      |   | Consistently optimization of images                                        |
| 3. Systematic examination of the lungs                                                                  |                                                                 |   |                                                                                                             |   |                                                                            |
| Consistently displaying systematic approach to the examination and presentation of relevant structures. | Unsystematic approach.                                          |   | Systematic approach satisfactory.                                                                           |   | Consistently displays a Systematic approach.                               |
| 4. Systematic examination of the heart                                                                  |                                                                 |   |                                                                                                             |   |                                                                            |
| Consistently displaying systematic approach to the examination and presentation of relevant structures. | Unsystematic approach.                                          |   | Systematic approach satisfactory.                                                                           |   | Consistently displays a Systematic approach.                               |
| 5. Interpretation of images                                                                             |                                                                 |   |                                                                                                             |   |                                                                            |
| Recognition of image pattern and interpretation of findings                                             | Unable to interpret any findings, unable to describe the images |   | Does not consistently interpret findings correctly, describes the images without giving a proper diagnosis. |   | Consistently interprets findings correctly, accurate ultrasound diagnosis. |
| 6. Documentation of examination                                                                         |                                                                 |   |                                                                                                             |   |                                                                            |
| Documentation of images is consistent with the ultrasound scan images                                   | Does not document any images                                    |   | Documents most relevant images                                                                              |   | Consistently documents relevant images                                     |
| 7. Duration of examination                                                                              |                                                                 |   |                                                                                                             |   |                                                                            |

|                                             |                                                                         |                                                                       |                                                                                                 |
|---------------------------------------------|-------------------------------------------------------------------------|-----------------------------------------------------------------------|-------------------------------------------------------------------------------------------------|
| Making the examination in the<br>given time | Unable to<br>evaluate<br>relevant<br>structures in<br>the given<br>time | Able to<br>evaluate<br>some<br>structures<br>during the<br>given time | Able to<br>evaluate all<br>structures in<br>the<br>proposed<br>approach in<br>the given<br>time |
|---------------------------------------------|-------------------------------------------------------------------------|-----------------------------------------------------------------------|-------------------------------------------------------------------------------------------------|

---
