# Supplementary material for: Efficiency of Simulation-Based Learning Using an ABC POCUS Protocol on a High-Fidelity Simulator
Source: MDPI journal article supplement (doi:10.3390/diagnostics14020173), 2024-01-12
Supplement: s1 [file s1]

**Table S2.** Practical and theoretical assessment scores and final assessment diagnosis

| Nr. | Evaluation criteria |     |     |     |     |     |     | Practical examination score | Pre-course MCQ score | Post-course MCQ score | Practical examination diagnosis                     | Recognition of diagnosis |
|-----|---------------------|-----|-----|-----|-----|-----|-----|-----------------------------|----------------------|-----------------------|-----------------------------------------------------|--------------------------|
|     | 1                   | 2   | 3   | 4   | 5   | 6   | 7   |                             |                      |                       |                                                     |                          |
| 1   | 3,3                 | 1,0 | 4,0 | 2,0 | 3,7 | 4,0 | 3,7 | 3,1                         | 73                   | 91                    | Bilateral Interstitial syndrome                     | yes                      |
| 2   | 4,0                 | 2,3 | 5,0 | 4,0 | 4,7 | 4,7 | 5,0 | 4,2                         | 82                   | 94                    | Bilateral Interstitial syndrome                     | yes                      |
| 3   | 4,0                 | 2,7 | 3,3 | 4,3 | 4,3 | 4,3 | 5,0 | 4,0                         | 89                   | 90                    | Left moderate pneumothorax                          | yes                      |
| 4   | 4,3                 | 2,7 | 3,3 | 3,7 | 3,0 | 3,3 | 4,3 | 3,5                         | 73                   | 91                    | Inferior vena cava collapse/hipovolemia             | yes                      |
| 5   | 4,7                 | 3,3 | 4,3 | 4,3 | 5,0 | 5,0 | 4,7 | 4,5                         | 79                   | 92                    | Cardiac tamponade                                   | yes                      |
| 6   | 4,7                 | 2,7 | 3,3 | 3,0 | 3,3 | 3,3 | 4,7 | 3,6                         | 85                   | 94                    | Left lung interstitial syndrome                     | no                       |
| 7   | 4,0                 | 2,7 | 2,3 | 3,0 | 2,0 | 2,7 | 4,3 | 3,0                         | 84                   | 90                    | Right lung consolidation and small pleural effusion | no                       |
| 8   | 4,7                 | 3,3 | 4,7 | 4,7 | 5,0 | 5,0 | 5,0 | 4,6                         | 85                   | 84                    | Right ventricle failure/PE                          | yes                      |
| 9   | 4,0                 | 2,7 | 3,3 | 3,7 | 3,7 | 4,0 | 4,7 | 3,7                         | 63                   | 74                    | Inferior vena cava collapse/hipovolemia             | yes                      |
| 10  | 4,0                 | 3,0 | 4,0 | 3,3 | 5,0 | 5,0 | 5,0 | 4,2                         | 80                   | 95                    | Right lung consolidation and small pleural effusion | yes                      |
| 11  | 4,0                 | 3,0 | 4,7 | 3,7 | 4,3 | 4,3 | 4,0 | 4,0                         | 75                   | 92                    | Bilateral Interstitial syndrome                     | yes                      |
| 12  | 4,0                 | 2,7 | 3,7 | 3,3 | 4,0 | 3,3 | 4,0 | 3,6                         | 83                   | 87                    | Right lung consolidation and small pleural effusion | yes                      |
| 13  | 4,7                 | 3,3 | 4,7 | 3,3 | 3,3 | 3,3 | 4,3 | 3,9                         | 82                   | 85                    | Reduced left ventricular ejection fraction          | no                       |
| 14  | 4,7                 | 3,3 | 4,7 | 3,7 | 5,0 | 4,7 | 4,0 | 4,3                         | 89                   | 87                    | Left massive pneumothorax                           | yes                      |
| 15  | 4,7                 | 3,0 | 4,7 | 4,0 | 5,0 | 4,7 | 4,7 | 4,4                         | 91                   | 92                    | Cardiac tamponade                                   | yes                      |
| 16  | 5,0                 | 3,0 | 4,3 | 4,0 | 5,0 | 5,0 | 4,7 | 4,4                         | 76                   | 88                    | Reduced left ventricular ejection fraction          | yes                      |
| 17  | 4,3                 | 2,7 | 3,3 | 3,3 | 3,7 | 3,7 | 4,3 | 3,6                         | 79                   | 77                    | Cardiac tamponade                                   | yes                      |
| 18  | 3,0                 | 2,3 | 3,7 | 2,7 | 3,7 | 3,7 | 3,7 | 3,2                         | 73                   | 83                    | Right massive pneumothorax                          | yes                      |
| 19  | 4,7                 | 3,0 | 4,3 | 3,7 | 4,7 | 4,7 | 4,7 | 4,2                         | 57                   | 72                    | Bilateral Interstitial syndrome                     | yes                      |

|    |     |     |     |     |     |     |     |     |    |    |                                                     |     |
|----|-----|-----|-----|-----|-----|-----|-----|-----|----|----|-----------------------------------------------------|-----|
| 20 | 3,7 | 3,0 | 4,3 | 3,3 | 4,3 | 4,3 | 4,3 | 3,9 | 86 | 91 | Left massive pneumothorax                           | yes |
| 21 | 3,3 | 2,7 | 4,3 | 3,0 | 4,0 | 4,0 | 4,0 | 3,6 | 61 | 87 | Reduced left ventricular ejection fraction          | no  |
| 22 | 4,7 | 3,0 | 4,3 | 3,3 | 4,3 | 3,3 | 4,3 | 3,9 | 65 | 87 | left pleural effusion                               | yes |
| 23 | 4,7 | 3,3 | 4,7 | 4,0 | 4,7 | 4,3 | 4,3 | 4,3 | 70 | 86 | Right massive pneumothorax                          | yes |
| 24 | 4,7 | 3,3 | 4,7 | 3,7 | 4,7 | 5,0 | 5,0 | 4,4 | 69 | 76 | Right ventricle failure/PE                          | yes |
| 25 | 4,0 | 2,7 | 3,7 | 3,7 | 3,0 | 3,0 | 3,7 | 3,4 | 82 | 94 | Right lung consolidation and small pleural effusion | no  |
| 26 | 4,3 | 3,0 | 4,0 | 4,0 | 4,7 | 3,7 | 4,7 | 4,0 | 67 | 80 | Cardiac tamponade                                   | yes |
| 27 | 5,0 | 3,3 | 4,7 | 4,3 | 4,7 | 3,7 | 4,7 | 4,3 | 60 | 83 | Left massive pneumothorax                           | yes |
| 28 | 4,0 | 2,7 | 4,7 | 4,3 | 4,0 | 4,0 | 4,7 | 4,0 | 67 | 83 | Right lung consolidation and small pleural effusion | yes |
| 29 | 4,7 | 3,3 | 4,3 | 4,7 | 5,0 | 3,3 | 5,0 | 4,3 | 86 | 89 | Right lung consolidation and small pleural effusion | yes |
| 30 | 4,3 | 3,0 | 4,7 | 4,7 | 4,7 | 3,3 | 4,7 | 4,2 | 96 | 87 | left pleural effusion                               | yes |
| 31 | 4,0 | 2,7 | 4,3 | 4,3 | 4,3 | 3,3 | 5,0 | 4,0 | 77 | 85 | Bilateral Interstitial syndrome                     | yes |
| 32 | 4,3 | 4,3 | 4,7 | 4,7 | 5,0 | 5,0 | 4,7 | 4,7 | 83 | 95 | Right ventricle failure/PE                          | yes |
| 33 | 5,0 | 3,3 | 5,0 | 4,7 | 5,0 | 5,0 | 5,0 | 4,7 | 88 | 83 | Left massive pneumothorax                           | yes |
| 34 | 5,0 | 3,0 | 4,7 | 4,0 | 5,0 | 4,7 | 5,0 | 4,5 | 87 | 93 | Right ventricle failure/PE                          | yes |
| 35 | 4,0 | 3,0 | 4,0 | 4,0 | 5,0 | 5,0 | 5,0 | 4,3 | 67 | 82 | Reduced left ventricular ejection fraction          | yes |
| 36 | 4,0 | 3,3 | 4,7 | 4,7 | 5,0 | 4,7 | 4,7 | 4,4 | 83 | 90 | Right lung consolidation and small pleural effusion | yes |
| 37 | 4,0 | 3,3 | 4,7 | 4,0 | 4,7 | 3,0 | 5,0 | 4,1 | 70 | 82 | Right ventricle failure/PE                          | yes |
| 38 | 4,0 | 3,0 | 2,7 | 2,7 | 1,7 | 2,0 | 3,7 | 2,8 | 90 | 91 | Left pleural effusion                               | no  |
